# Supplementary material
Source: Springer Nature journal article supplement (https://www.springermedizin.de/resource/supplementary/12943_2010_637_MOESM7_ESM.pdf/9554456)

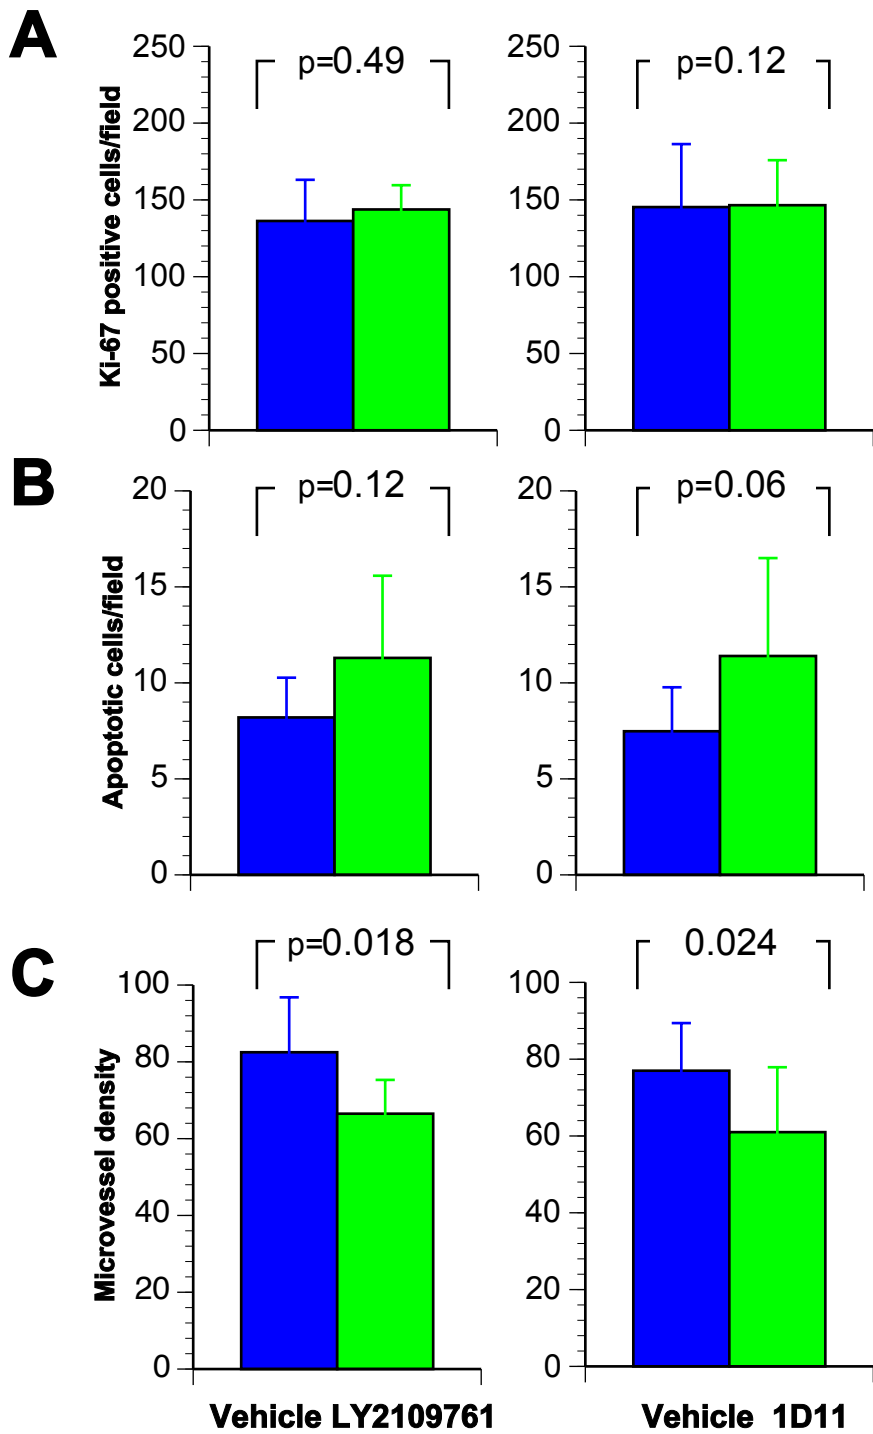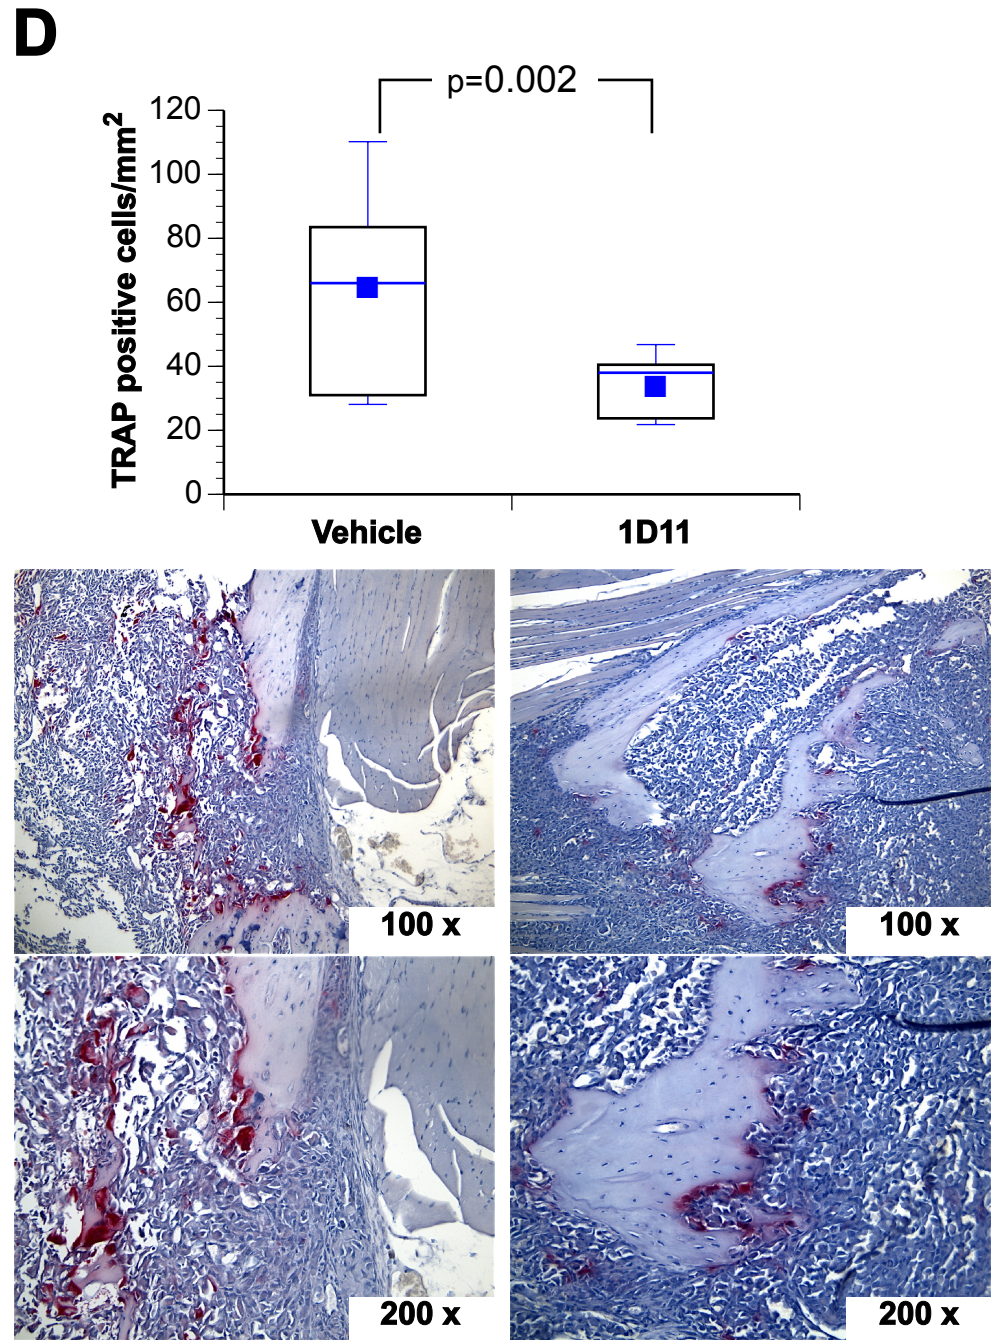

**Figure 6**

Supplement: MOESM7 [file 9554456]
